# Supplementary material
Source: PubMed Central journal article supplement (PMC2705020)

**Supplemental Figure S1.** ABA-hypersensitive early seedling growth inhibition of different mutants compared to wild type at different concentrations of ABA ranging from 25 to 500 nM ABA. Approximately 80 seeds of each genotype were sowed on each plate and photographs were taken 12 d later. Three independent experiments were performed with similar results.

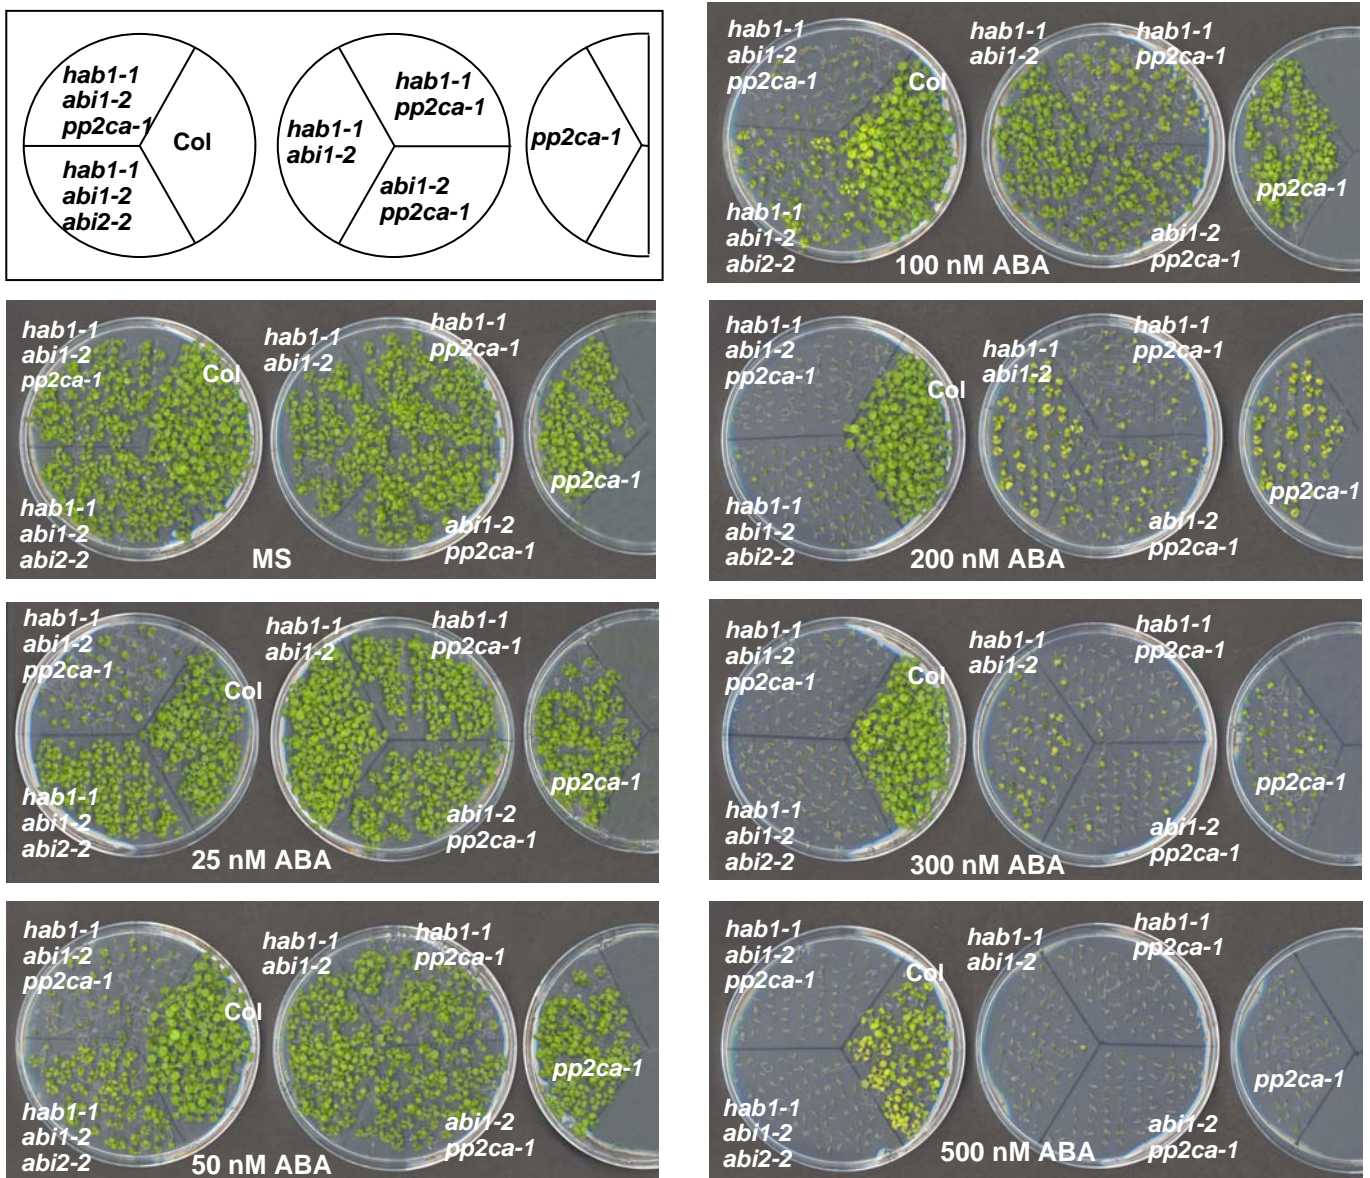

**Supplemental Figure S2.** Comparison of the endogenous ABA levels in wild type and triple mutants under non-stressed conditions or after treatment with 350 mM mannitol for 8 h. ABA content was measured in 12-day-old seedlings grown in MS plates. The results are average values of three independent biological samples. The error bars represent the standard deviations.

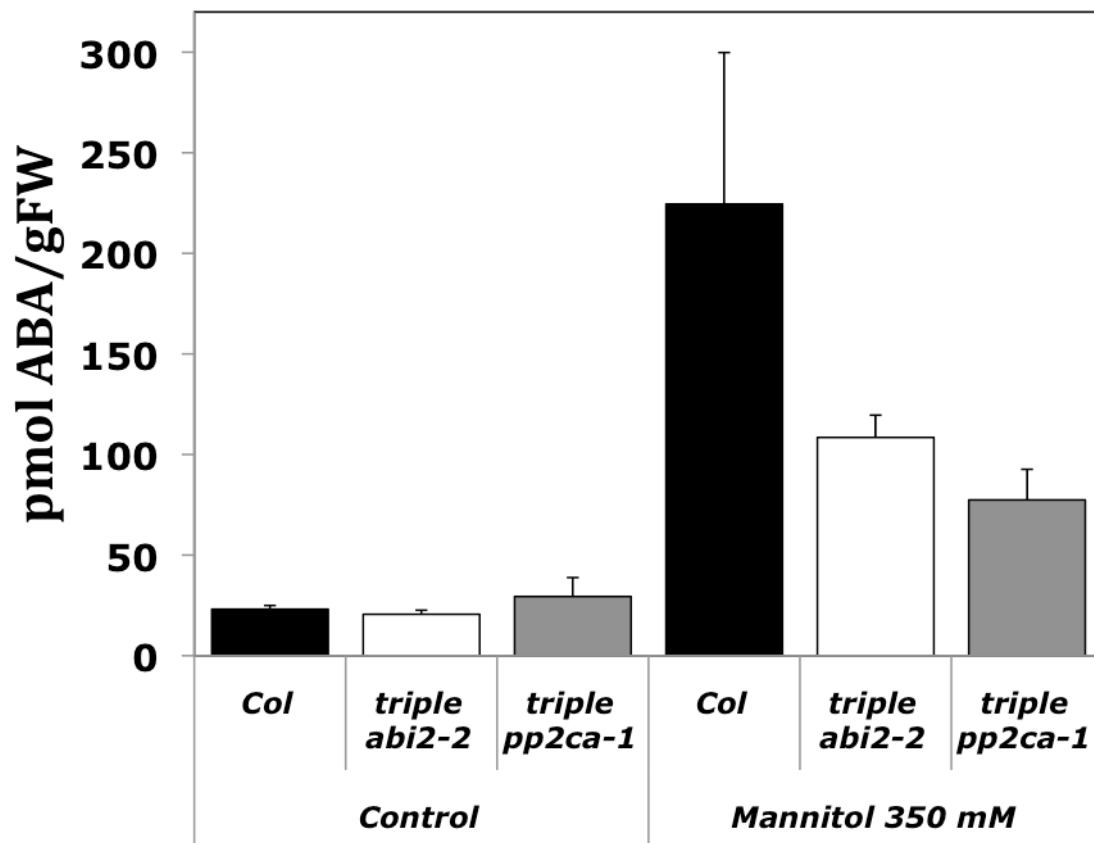

**Supplemental Figure S3.** Cladogram and gene expression data from Clade A PP2Cs. A, Cladogram, according to Schweighofer et al., (2004). B, Expression levels of clade A PP2Cs in whole 7-day-old seedlings mock- or ABA-treated for 3 h (data produced by the AtGen-Express Consortium (<http://web.uni-frankfurt.de/fb15/botanik/mcb/AFGN/atgenex.htm>)). C, Expression levels in dry seed and after 24 h seed imbibition (data produced by the AtGen-Express Consortium). D, Expression levels in mesophyll and guard cells that were either mock- or ABA-treated (Yang et al., 2008). Data were obtained from the Bio-Array Resource for Arabidopsis Functional Genomics (<http://bar.utoronto.ca>)

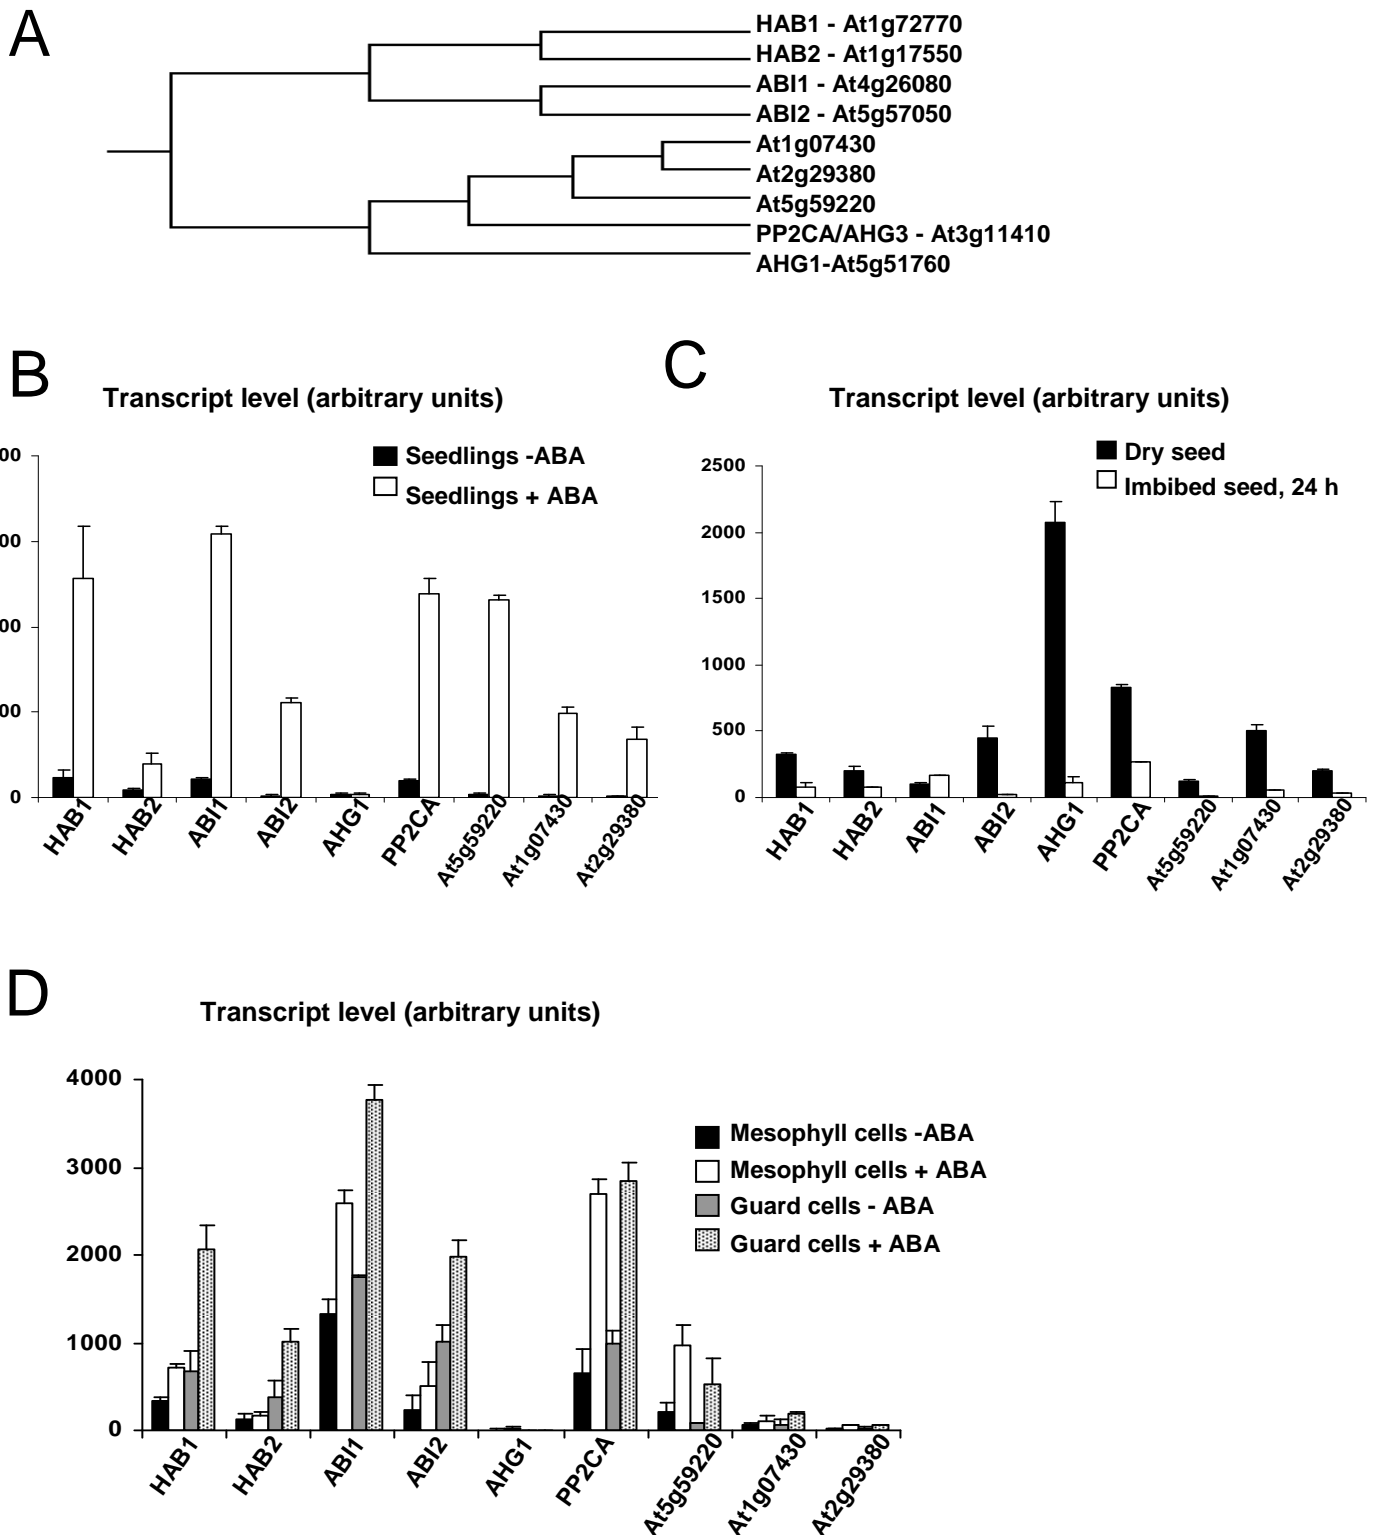

Supplement: pp.109.137174_1.pdf [file pp.109.137174_1.pdf]
